# Supplementary material
Source: PubMed Central journal article supplement (PMC5165122)
Supplement: AEM.02359-16_zam999117579s1.pdf [file AEM.02359-16_zam999117579s1.pdf]

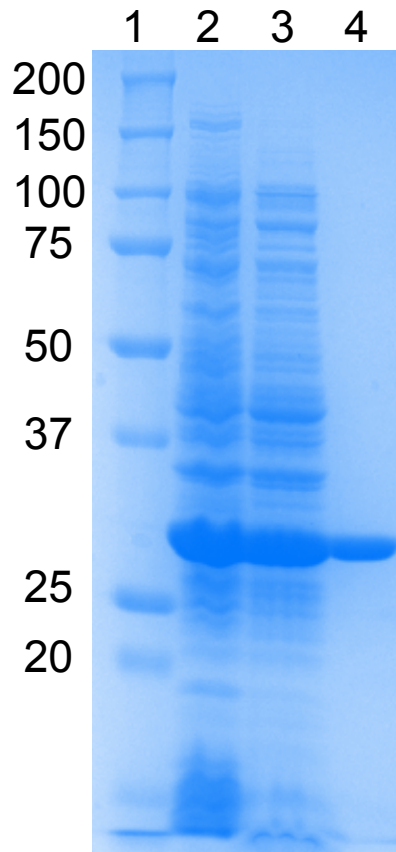

**FIG. S1. Overexpression and purification of TraC<sub>N292</sub> protein.** The TraC<sub>N292</sub> protein was overproduced by IPTG induction of BL21(DE3) cells harboring pET22bN292TraC, and was purified as described in Materials and Methods. Protein fractions were electrophoresed in a 12.5% SDS-polyacrylamide gel and stained with Coomassie brilliant blue. Lane 1, molecular-mass standards; lane 2, total cell fraction; lane 3, crude cell extract; and lane 4, purified fraction after affinity resin treatment. The locations of the molecular mass markers (in kilodaltons) are indicated at the left.

1 Motif 1

NAH7 MFNVTSIKGSNQYAAAGY<sup>Y</sup>TA-ADDY<sup>Y</sup>AKESPG-EWQGI GAELLGLAGPIDQKELAKLFDGKLPNGEVMPKTFDKETGNR  
pWW0 .F..L..D...F<sup>S</sup>N-...A...E.A...R...R.A...T.  
R388 .LSHMVLRQDIGR..S<sup>.</sup>.EDG...DG<sup>S</sup>AS...K...E...S.EV.S.RFRE.LA.NIGE.HRIMRSATRQDSKE

Motif 2 Motif 3

NAH7 RMGL<sup>D</sup>LTFSAPKSVSMQAL<sup>I</sup>AGDKDVVA<sup>A</sup>HRAVTKAMEHVEKLAQARRKEHGKSMLE<sup>R</sup>TGNLIIGKFR<sup>H</sup>ELSRAKDPQL  
pWW0 .....M.....S.E.R..T.L.VN..T...S...V.....M.....M  
R388 .I.....L...V...AEI<sup>I</sup>K...ARTL.QA.AR...Q.IQ..TRI.T...V.....T..ER....

NAH7 <sup>H</sup>THAVVMNAT<sup>R</sup>REDGKWRAIHND<sup>I</sup>FKIQP<sup>I</sup>DAMYKELAKELRELGYEIRVLDKDG<sup>N</sup>FELAHISR<sup>D</sup>QIEAFSSRAKVI  
pWW0 .....MT..S.....LR...Y...V.....I..Q...A.....NQ.....S...  
R388 .....IL.M.K.S...Q...L<sup>K</sup>.E.V.RTRYL<sup>G</sup>.V.NA...H..Q<sup>K</sup>..Q<sup>L</sup>..Y<sup>G</sup>....D...D.Q...G..K.TE<sup>Q</sup>.

292

NAH7 EEALAKDGKTRSNATALEKQIIAMAT<sup>R</sup>PRKDERDRHLVKEYVVTKARDL<sup>G</sup>IEFGGRSQLDNQ<sup>E</sup>YGRRES<sup>E</sup>SHAEHN<sup>L</sup>PE  
pWW0 .D.....AD..P.....E...D..A..H...R..AP.NGG-P..YS..Q  
R388 A.WY.AR.LDPNSV<sup>S</sup>LEQ..AAK<sup>V</sup>LS.AK.TSV..EALRAE.QAT<sup>.</sup>KE...D.SR.EWSGREK<sup>G</sup>.SEKQA----.SFMP

NAH7 GITAGQAVVQYAINH<sup>L</sup>TEREQVVGESDLR<sup>T</sup>AAALRRAVGLASPSEVD<sup>E</sup>EIKRLV<sup>K</sup>QGT<sup>L</sup>IESPPT<sup>Y</sup>R--MATGK-DGAALS  
pWW0 ..P.....N...V.....T.DQ.N..R.....--.PN.DL.SP<sup>V</sup>..  
R388 SDE.AKRA.R.....Q<sup>S</sup>.MD.RE.VDT.MKH...A.RLEDI<sup>Q</sup>K.LL.QTET.Y..REA.R..PGG<sup>Q</sup>..PT.EPGKT

473

NAH7 PAGWRALLKEQK<sup>G</sup>WSEKEAQYV<sup>K</sup>MAINRGS<sup>L</sup>VEAEKRY<sup>T</sup>TQ<sup>R</sup>ALKREKAILAIERSGRG<sup>V</sup>APLLSKEQVAKALES<sup>T</sup>L  
pWW0 .....H.Q.L.....R..DK..K...EP.....K.....T...T..MT.....G...  
R388 R.E.V.E.AA-.MKQGA.RER.DN..KT.G.PI.P...T.E...R.Q...D...A...VIAA.AARER.A.TN.

NAH7 SAGQYQAVEVIVSTSN<sup>R</sup>FVGIQGDAGT<sup>G</sup>KTYSDRAV<sup>K</sup>LIESVNNAMTERST<sup>T</sup>DAVFRVVALAPYGN<sup>V</sup>TALKNEGLDA  
pWW0 .P..F.....N.....D...A..ATNNPQDIT<sup>G</sup>Y.....  
R388 NQ..RE.A.L...AA..V..V..F.....SHML.T.KQM..G-----EGYH.R...A..S..K..RELN<sup>V</sup>E.

NAH7 HTLASFFHTKDK<sup>L</sup>DER<sup>T</sup>IVVLDEAGVVGARQMEQLM<sup>R</sup>IEQSGARLVQLGDT<sup>K</sup>QTEAIEAGK<sup>P</sup>FAQLQNGM<sup>Q</sup>TARIKE  
pWW0 .....N.G.AK...I.....R..E.....I.....S.....  
R388 N....LRA...NI.S..VL.I.....PT.L...TLKLA.KA..V.LM...A..K...R..D...AA...HMR.

670

NAH7 IQRQKNQELKIAVQHAADGN<sup>P</sup>GK<sup>S</sup>LEHVNHVEELRE<sup>P</sup>GQRHQAI<sup>V</sup>RDYMSL<sup>T</sup>PQERKEV<sup>L</sup>IAGTNKDRK<sup>Q</sup>INAMTRES<sup>L</sup>  
pWW0 .....DP...R.....E.Q.T...LK...TASD.....A...DQ.....E..T.A.QA.  
R388 .....P.....EL..AGKASS...RIKD.T.IKNHHE.RA.VAEA.IA.K.D..DRT...S...EA.RE..QIV..G.

NAH7 GLVGNKELP<sup>T</sup>LN<sup>R</sup>VDTTQAERRYAPS<sup>Y</sup>KGMIVQPEK<sup>D</sup>YIRAGLSRGELY<sup>T</sup>VDQALPG<sup>N</sup>VL-VVKDKNG<sup>N</sup>RVEFN<sup>R</sup>PKL  
pWW0 .F.K...FE.....S.D.....Q...I...K...V...V.....RS...F...QA  
R388 .TA.K.I.FD.V.....H<sup>S</sup>KN.QV.HVI...R..AKT..Q...R.VETG...R.T.IGEHD.Q.IQ.S.MTH

806

NAH7 TKLSVYNLEKPEF<sup>S</sup>VGDLV<sup>R</sup>ITRNDQKLDLTNGDRM<sup>V</sup>VGNGANGVIELASLKEKDG<sup>T</sup>PERVVALP<sup>T</sup>NRPLHLEHAYSAT<sup>V</sup>  
pWW0 .....K...LA...I..N.Q.P.....SIEG..VQ.....VN.Q...T.S...K.....  
R388 .I...QP.RA.LA..TI...KH...A...K..AVEDRK<sup>V</sup>TVTDG.-----N.E..DK..VD..AT..

914

NAH7 HSAQGLTND<sup>R</sup>VMISINTKSL<sup>T</sup>TSQNLWYVAISRARHEARI<sup>Y</sup>TDSIAGLPAAIANRYDK<sup>T</sup>TALS<sup>L</sup>-----Q<sup>Q</sup>ARE  
pWW0 .....R.....L.....V.A...K.....K.....E..  
R388 .S...S...L.DAHAE.R..RKDVY.....F...VF.NDRGK.....RENI.SA.HD.ARD<sup>R</sup>GGRSAAAER<sup>Q</sup>..

NAH7 RQRNESIKP<sup>R</sup>TVLDGKELERK<sup>Q</sup>RSALDGAGL<sup>G</sup>KSGV  
pWW0 ..RD..Q...S..RA...TG...PSS.NARI  
R388 Q..ERERN<sup>R</sup>Q.QQPAHDRQ<sup>K</sup>AA.E.ER.MEA.R---

**FIG. S2. Comparison of relaxases from NAH7, pWW0, and R388.** These proteins have the relaxase, AAA, and UvrD-like helicase domains, which correspond to the amino-acid positions from 15 to 292, from 473 to 670, and from 806 to 914, respectively, in the NAH7 relaxase. Motifs 1 to 3 are conserved in the relaxase domain of MOB<sub>F</sub>-family relaxases (1). The Y18, Y26, D85, H150, H161, and H163 residues in the R388 relaxase have been shown to be important for conjugation (2), and they are depicted in red. dot: amino-acid residue identical to that of NAH7; and hyphen, no amino-acid residue.

## REFERENCES

1. **Garcillan-Barcia MP, Francia MV, de la Cruz F.** 2009. The diversity of conjugative relaxases and its application in plasmid classification. *FEMS Microbiol Rev* **33**:657-687.
2. **Guasch A, Lucas M, Moncalian G, Cabezas M, Perez-Luque R, Gomis-Ruth FX, de la Cruz F, Coll M.** 2003. Recognition and processing of the origin of transfer DNA by conjugative relaxase TrwC. *Nat Struct Biol* **10**:1002-1010.
